# Supplementary material for: Medication management at home: medication-related risk factors associated with poor health outcomes
Source: Oxford University Press journal article supplement (doi:10.1093/ageing/afi202), 2005-11-01
Supplement: afi202_Supplementary_Data.zip [file afi202_Supplementary_Data.zip]

Archive with 1 entries (1 files):
- afi202nSupplementary_figures.pdf
