# Supplementary material for: Medication management at home: medication-related risk factors associated with poor health outcomes
Source: Oxford University Press journal article supplement (doi:10.1093/ageing/afi202), 2005-11-01
Supplement: afi202_Supplementary_Data.zip [file afi202_Supplementary_Data.zip › afi202nSupplementary_figures.pdf]

## Supplementary figures

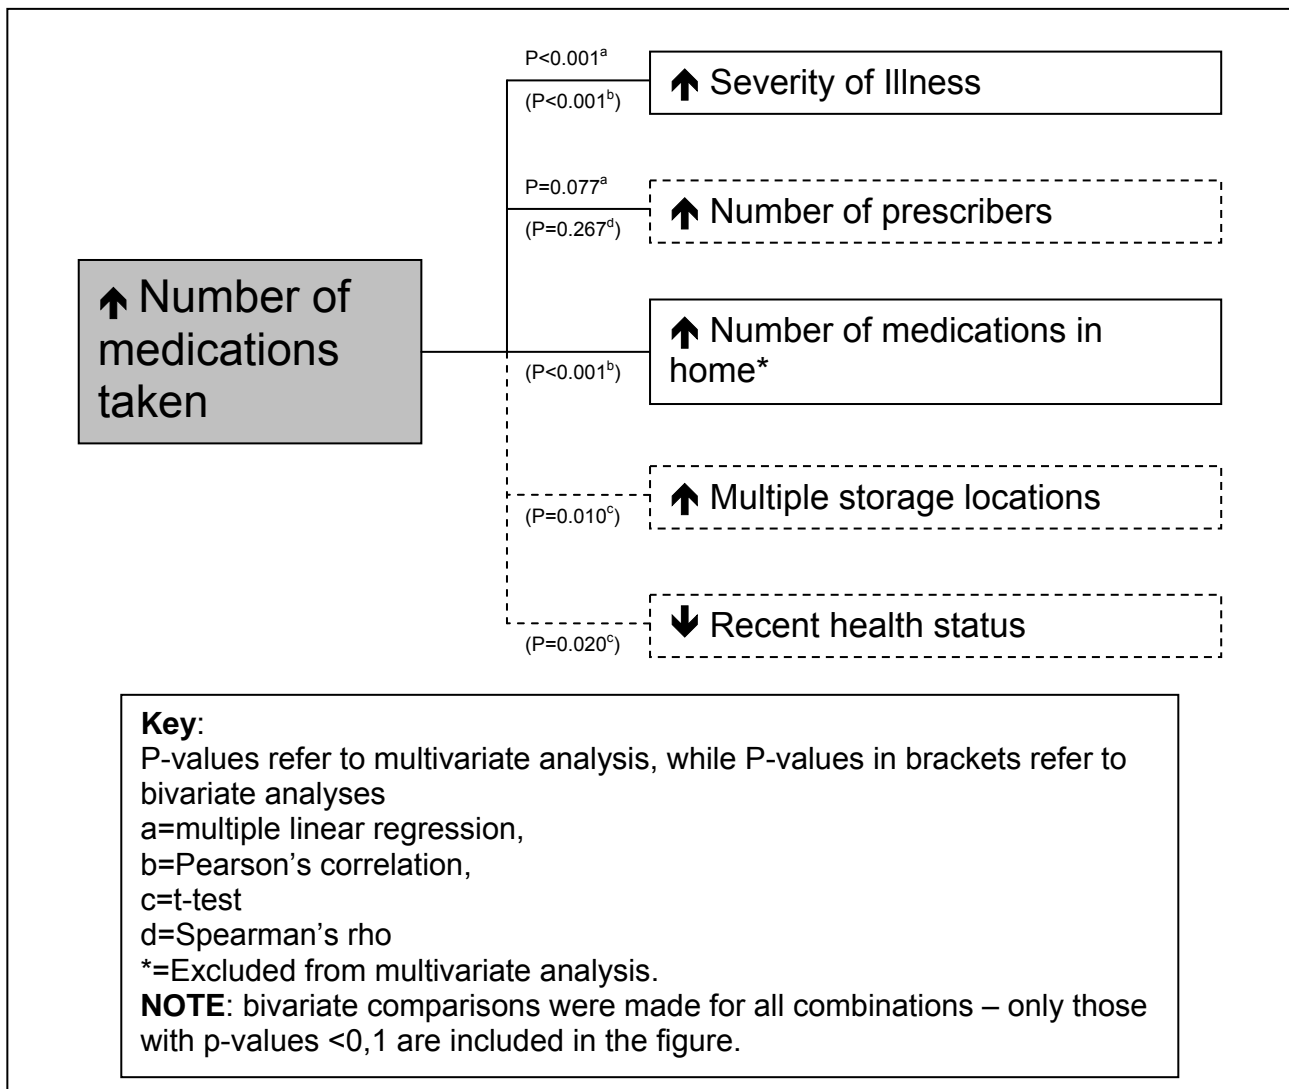

The solid line indicates multivariate associations while the dotted lines indicate only bivariate associations.

**Figure S1. Bivariate and multivariate (general linear model) associations between medication-related risk factors and medications currently taken**

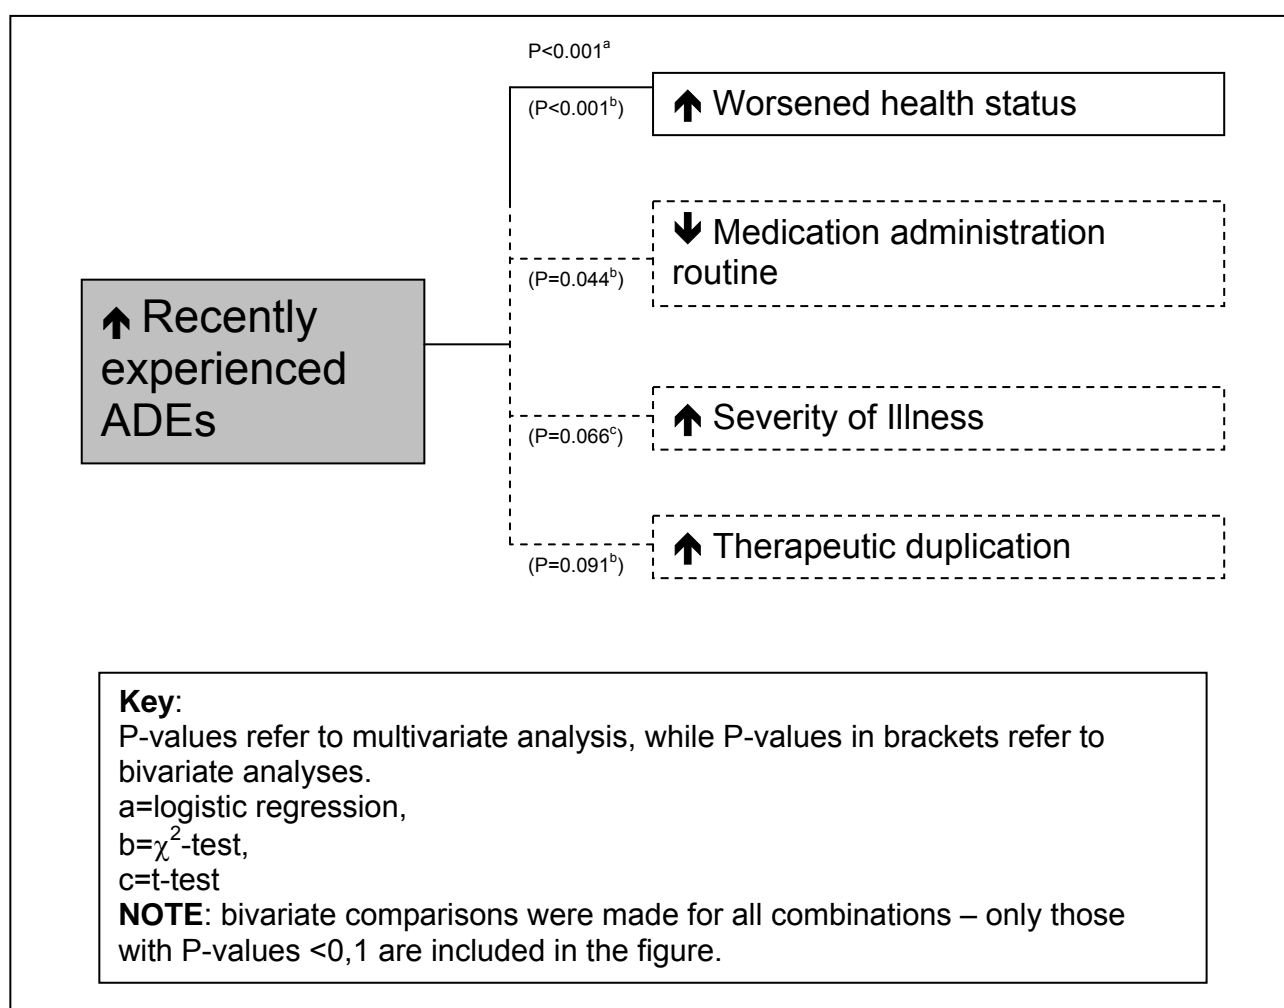

The solid line indicates multivariate associations while the dotted lines indicate only bivariate associations.

Figure S2. Bivariate and multivariate (logistic regression) associations between medication-related risk factors and adverse drug events

**Supporting data to Figure S2. Bivariate and multivariate (logistic regression) relations between medication-related risk factors and recently experienced ADEs**

|                                  | Bivariate                              |                   | Multivariate (logistic regression) |                           |
|----------------------------------|----------------------------------------|-------------------|------------------------------------|---------------------------|
|                                  | Number (percent) of patients with ADEs | P value           | Odds ratio (CI) for ADEs*†         | P value                   |
| Health status recently worsened: |                                        |                   |                                    |                           |
| Yes                              | 27 (49%)                               |                   | 4.1 (2.0-8.2)                      |                           |
| No                               | 23 (19%)                               | <b>&lt;0.001‡</b> |                                    | <b>&lt;0.001</b>          |
| System used to take medications: |                                        |                   |                                    |                           |
| Yes                              | 30 (22%)                               |                   |                                    |                           |
| No                               | 20 (36%)                               | <b>0.044‡</b>     |                                    | NS                        |
| Therapeutic duplication:         |                                        |                   |                                    |                           |
| Yes                              | 17 (34%)                               |                   |                                    |                           |
| No                               | 34 (22%)                               | 0.091‡            |                                    | NS                        |
|                                  | ADEs                                   |                   | P value                            | Odds ratio (CI) of ADEs*† |
|                                  | ADEs                                   | No ADEs           |                                    |                           |

|                             |                  |                  |       |   |    |
|-----------------------------|------------------|------------------|-------|---|----|
| Mean of DUSOI-A ( $\pm$ sd) | 68 ( $\pm$ 22.6) | 62 ( $\pm$ 20.1) | 0.066 | . | NS |
|-----------------------------|------------------|------------------|-------|---|----|

\* PCS excluded in multivariate analysis, † Number of medications taken excluded in multivariate analysis, ‡  $\chi^2$ -test, || t-test

NOTE: bivariate comparisons were made for all combinations – only those with p-values <0.1 are included in the table.

Bivariate relations not included in the table had a p-value of 0.1 or higher.
